# Supplementary material for: Exploring the electrocatalytic activity of cobalt disulfide nanosheets towards the hydrogen evolution reaction with in situ ECAFM
Source: Royal Society of Chemistry journal article supplement (doi:10.1039/d1se00765c), 2021-01-01
Supplement: d1se00765c1.pdf [file d1se00765c1.pdf]

## Supplementary Information

### Exploring the electrocatalytic activity of cobalt disulfide nanosheets towards hydrogen evolution reaction with *in situ* ECAFMs

Yan Dong, Hui Sun, Guangyi Liu

College of Chemistry and Chemical Engineering, Central South University, Changsha, 410083, China

#### 3.1.1 SEM and XRD

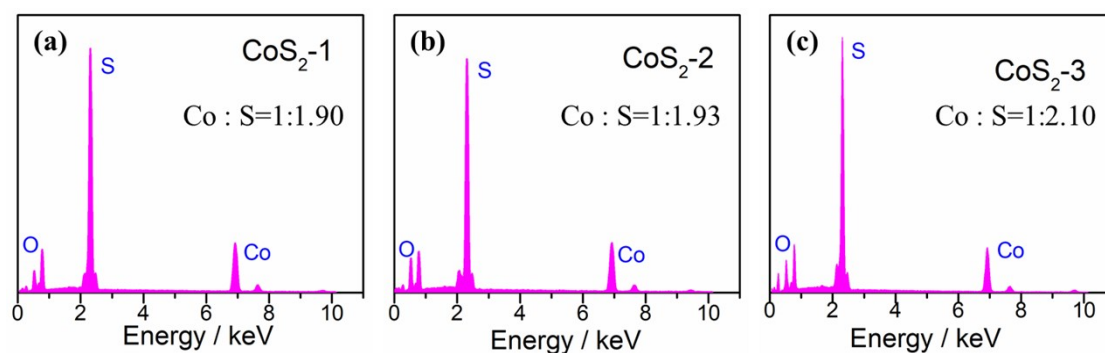

Figure S1. EDX of (a) CoS<sub>2</sub>-1, (b) CoS<sub>2</sub>-2, (c) CoS<sub>2</sub>-3.

#### 3.2.1 Basic electrocatalytic property

Hydrogen evolution reaction (HER) is a multi-step electrochemical process which generates gaseous hydrogen from the surface of an electrode. According to the classic theory, the reaction mechanism in acid and alkaline media could be described by the following Eqs.S1-S5 [1-3].

(1) Volmer reaction

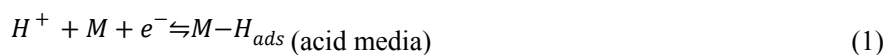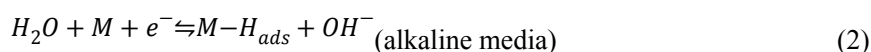

(2) Heyrovsky reaction

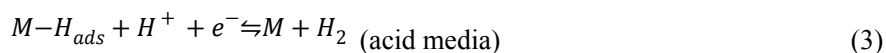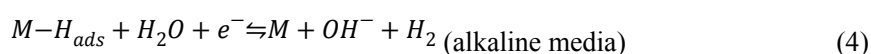

(3) Tafel reaction

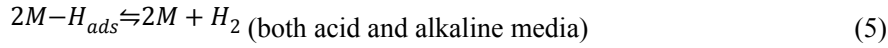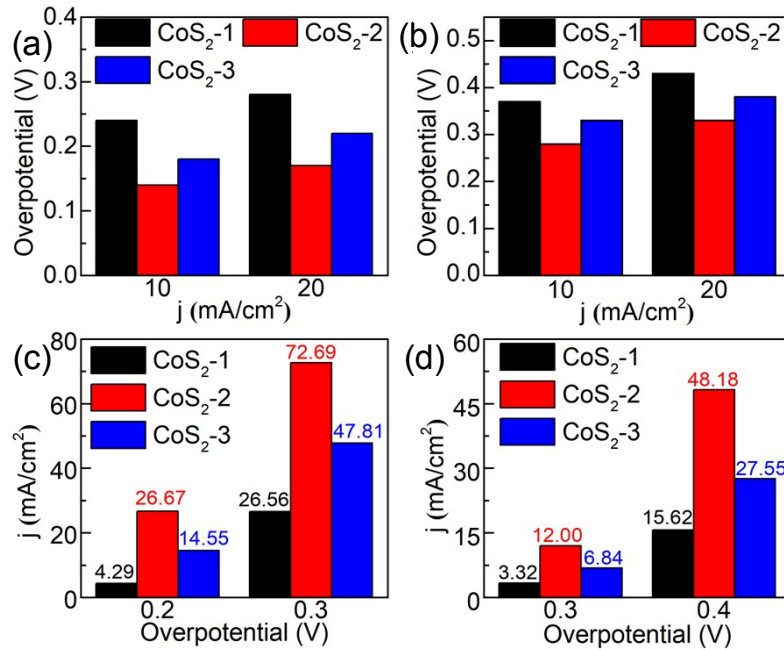

**Figure S2.**  $v$ - $j$  graphs in 0.5 M  $H_2SO_4$  (a) and 1.0 M KOH (b) solutions, and  $j$ - $v$  graphs (c) in 0.5 M  $H_2SO_4$  and 1.0 M KOH (d) solutions.

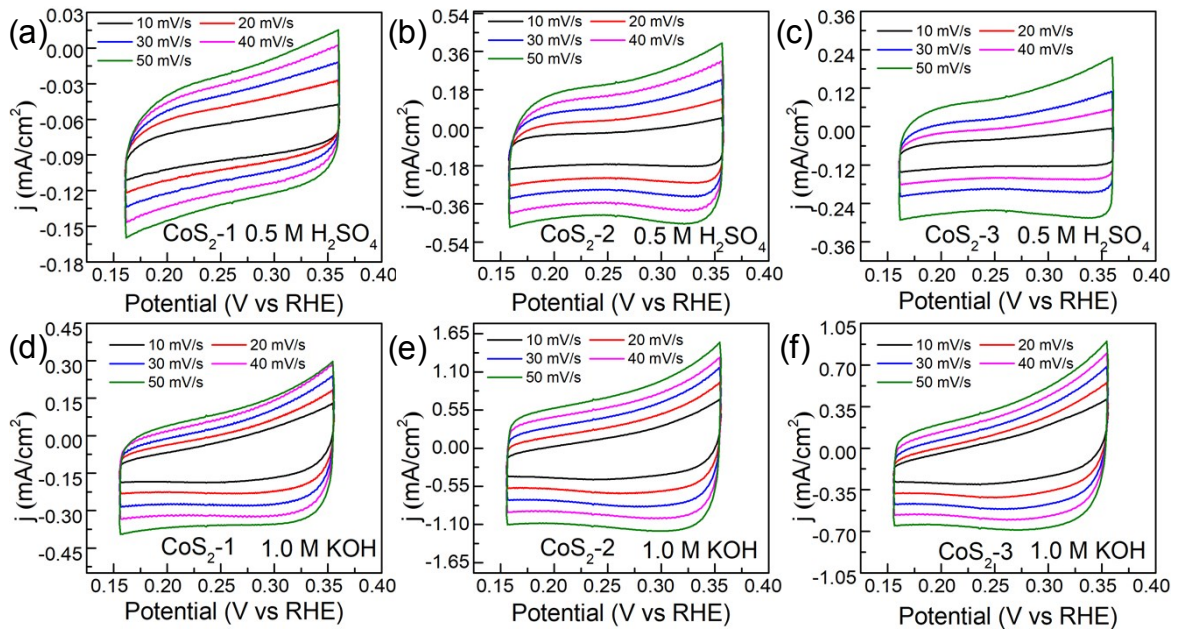

**Figure S3.** CV curves at different scan rates (10-50  $mV \cdot s^{-1}$ ) of the as-prepared (a)  $CoS_2$ -1, (b)  $CoS_2$ -2, (c)  $CoS_2$ -3 in acidic solutions and (d)  $CoS_2$ -1, (e)  $CoS_2$ -2, (f)  $CoS_2$ -3 in alkaline solutions.

The electrochemical active surface area (ECSA) is calculated through Eq. S6 [4, 5].

$$ECSA = C_{dl}/C_s \quad (6)$$

Where  $C_s$  is the specific capacitance of the sample or the capacitance of an atomically smooth planar surface of the material per unit area under identical electrolyte conditions. Based on typical reported values,  $C_s = 0.040 \text{ mF cm}^{-2}$  in 1M KOH solutions and  $C_s = 0.035 \text{ mF cm}^{-2}$  in 0.5 M  $\text{H}_2\text{SO}_4$  solutions [6]. In this work, the ECSA was estimated to be 28.57, 297.14 and 97.14  $\text{cm}^2$  in 0.5 M  $\text{H}_2\text{SO}_4$  solutions for  $\text{CoS}_2$ -1,  $\text{CoS}_2$ -2 and  $\text{CoS}_2$ -3 catalysts, while in 1M KOH solutions was 90, 400 and 207.5  $\text{cm}^2$ , respectively. These ECSA values were used for the specific activity calculated in the following section.

**The Specific Activity (SA) is calculated through Eq. S7 [5].**

$$\text{SA (mA cm}^{-2}\text{)} = J/\text{ECSA} \quad (7)$$

Where  $J$  is the current density ( $\text{mA cm}^{-2}$ ).

**The Mass Activity (MA) is calculated through Eq. S8 [5].**

$$\text{MA (mA mg}^{-1}\text{)} = J/m \quad (8)$$

Where  $J$  is the current density ( $\text{mA cm}^{-2}$ ),  $m$  is mass loading ( $\text{mg cm}^{-2}$ ).

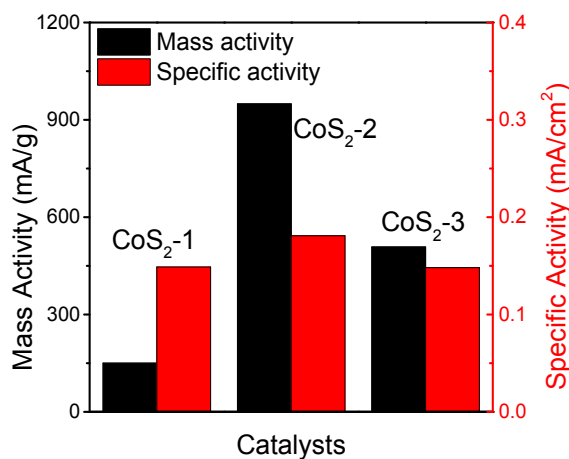

**Figure S4.** Mass activity and specific activity of the catalysts at an overpotential of 200 mV for HER in acidic solutions.

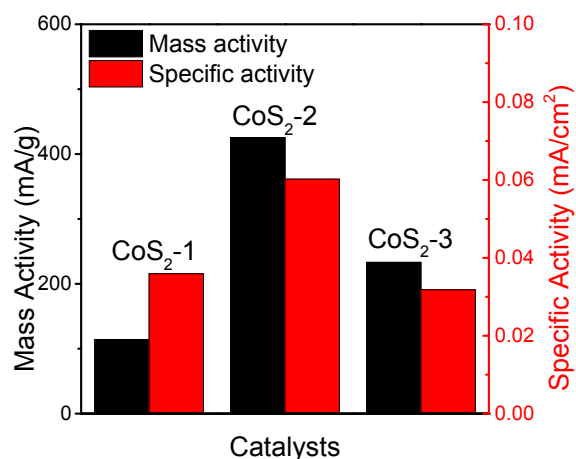

**Figure S5.** Mass activity and specific activity of the catalysts at an overpotential of 300 mV for HER in alkaline solutions.

**Table S1** HER performances for some reported base metals electrocatalysts.

| Catalysts                                        | Overpotential $\eta$ (mV) at corresponding j | Current density j (mA/cm <sup>2</sup> ) | Tafel slope (mV/dec) | Electrolytes                         | References |
|--------------------------------------------------|----------------------------------------------|-----------------------------------------|----------------------|--------------------------------------|------------|
| CoS <sub>2</sub> nanosheet                       | 145                                          | 10                                      | 26                   | 0.5 M H <sub>2</sub> SO <sub>4</sub> | This work  |
|                                                  | 289                                          | 10                                      | 105                  | 1.0 M KOH                            | This work  |
| CoS <sub>2</sub> nanowire/CC                     | 161                                          | 10                                      | 90                   | 1.0 M KOH                            | [7]        |
| CoS <sub>2</sub> microwire                       | 158                                          | 10                                      | 58                   | 0.5 M H <sub>2</sub> SO <sub>4</sub> | [8]        |
| CoNi <sub>2</sub> S <sub>4</sub>                 | 255                                          | 10                                      | 85                   | 1.0 M KOH                            | [9]        |
| Ni/Co/MoS <sub>2</sub> nanoboxes                 | 155                                          | 10                                      | 51                   | 0.5 M H <sub>2</sub> SO <sub>4</sub> | [10]       |
| CoS <sub>2</sub>                                 | 273                                          | 10                                      | 133                  | 1.0 M KOH                            | [11]       |
| CoS <sub>x</sub> /MoS <sub>2</sub>               | 239                                          | 10                                      | 103                  | 0.5 M H <sub>2</sub> SO <sub>4</sub> | [12]       |
| CoS <sub>2</sub> /MoS <sub>2</sub>               | 173                                          | 10                                      | 61                   | 0.5 M H <sub>2</sub> SO <sub>4</sub> | [13]       |
| Co <sub>3</sub> S <sub>4</sub> /MoS <sub>2</sub> | 210                                          | 10                                      | 88                   | 0.5 M H <sub>2</sub> SO <sub>4</sub> | [14]       |

### 3.2.3 FESEM and XPS of CoS<sub>2</sub>-2 after HER catalysis

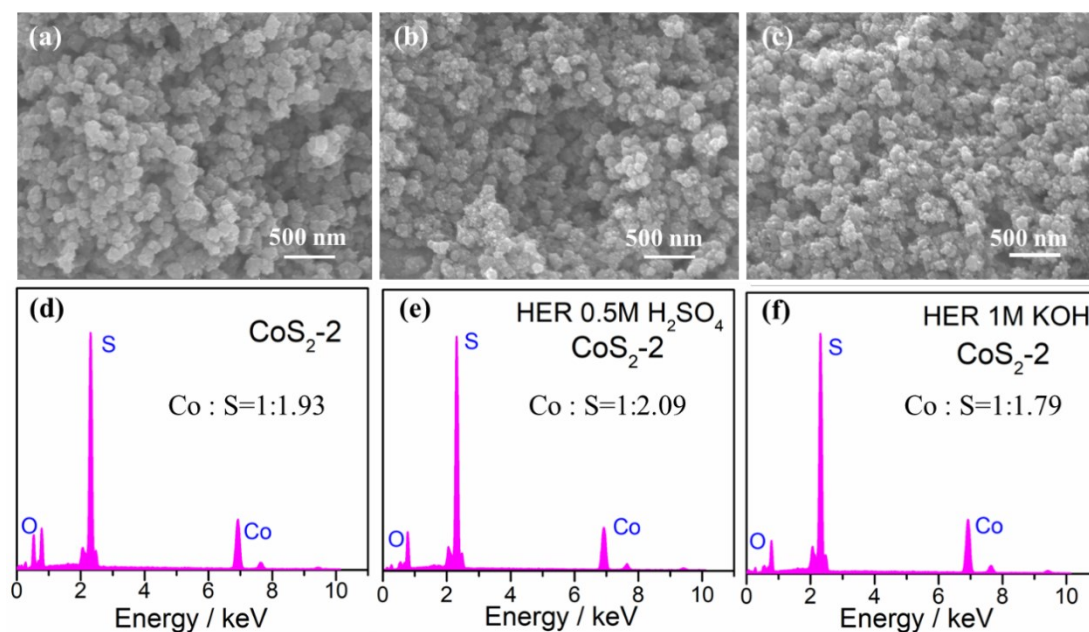

**Figure S6.** FESEM morphologies of (a) the as-prepared CoS<sub>2</sub>-2 samples, (b) after HER in 0.5 M H<sub>2</sub>SO<sub>4</sub> solutions, (c) after HER in 1.0 M KOH solutions, and (d-f) their corresponding EDX.

### Reference

- [1] Y. Zheng, Y. Jiao, M. Jaroniec, S.Z. Qiao. Advancing the electrochemistry of the hydrogen-evolution reaction through combining experiment and theory. *Angew Chem. Int. Ed.* **2015**, *54*, 52-65. DOI:10.1002/anie.201407031.
- [2] V.R. Stamenkovic, D. Strmcnik, P.P. Lopes, N.M. Markovic. Energy and fuels from electrochemical interfaces. *Nat. Mater.* **2016**, *16*, 57-69. DOI:10.1038/nmat4738.
- [3] Z.J. Jiang, G. Xie, L. Guo, J. Huang, Z. Jiang. Co nanoparticles coupling induced high catalytic activity of nitrogen doped carbon towards hydrogen evolution reaction in acidic/alkaline solutions. *Electrochimica Acta* **2020**, *342*, 136076. DOI:10.1016/j.electacta.2020.136076.
- [4] Y. Zhang, L. Gao, E.J.M. Hensen, J.P. Hofmann. Evaluating the stability of Co<sub>2</sub>P electrocatalysts in the hydrogen evolution reaction for both acidic and alkaline electrolytes. *ACS Energy Lett.* **2018**, *3*, 1360–1365. DOI: 10.1021/acsenerylett.8b00514.
- [5] Y. Li, Z. Mao, Q. Wang, D. Li, R. Wang, B. He, Y. Gong, H. Wang. Hollow nanosheet array of phosphorus-anion-decorated cobalt disulfide as an efficient electrocatalyst for overall water splitting. *Chem. Eng. J.* **2020**, *390*, 124556. DOI:10.1016/j.cej.2020.124556.
- [6] C.C.L. McCrory, S. Jung, J.C. Peters, T.F. Jaramillo. Heterogeneous electrocatalysts for the oxygen evolution reaction. *J. Am. Chem. Soc.* **2013**, *135*, 16977– 16987. DOI:10.1021/ja407115p.
- [7] P. Chen, T. Zhou, M. Chen, Y. Tong, N. Zhang, X. Peng, W. Chu, X. Wu, C. Wu, Y. Xie. Enhanced catalytic activity in nitrogen-anion modified metallic cobalt disulfide porous nanowire

- arrays for hydrogen evolution. *ACS Catalysis* **2017**, *7*, 7405-7411. DOI:10.1021/acscatal.7b02218.
- [8] M.S. Faber, R. Dziejczak, M.A. Lukowski, N.S. Kaiser, Q. Ding, S. Jin. High-performance electrocatalysis using metallic cobalt pyrite (CoS<sub>2</sub>) micro- and nanostructures. *J. Am. Chem. Soc.* **2014**, *136*, 10053-10061. DOI:10.1021/ja504099w.
- [9] D. Wang, X. Zhang, Z. Du, Z. Mo, Y. Wu, Q. Yang, Y. Zhang, Z. Wu. CoNi<sub>2</sub>S<sub>4</sub> nanoparticles as highly efficient electrocatalysts for the hydrogen evolution reaction in alkaline media. *Int. J. Hydrogen Energ.* **2017**, *42*, 3043-3050. DOI:10.1016/j.ijhydene.2016.09.115.
- [10] X.Y. Yu, Y. Feng, Y. Jeon, B. Guan, X.W. Lou, U. Paik. Formation of Ni-Co-MoS<sub>2</sub> nanoboxes with enhanced electrocatalytic activity for hydrogen evolution. *Adv. Mater.* **2016**, *28*, 9006-9011. DOI:10.1002/adma.201601188.
- [11] Y. Wang, Y. Zhu, S. Afshar, M.W. Woo, J. Tang, T. Williams, B. Kong, D. Zhao, H. Wang, C. Selomulya. One-dimensional CoS<sub>2</sub>-MoS<sub>2</sub> nano-flakes decorated MoO<sub>2</sub> sub-micro-wires for synergistically enhanced hydrogen evolution. *Nanoscale* **2019**, *11*, 3500-3505. DOI:10.1039/c8nr08418a.
- [12] L. Yang, L. Zhang, G. Xu, X. Ma, W. Wang, H. Song, D. Jia. Metal-organic-framework-derived hollow CoS<sub>x</sub>@MoS<sub>2</sub> microcubes as superior bifunctional electrocatalysts for hydrogen evolution and oxygen evolution reactions. *ACS Sustain. Chem. Eng.* **2018**, *6*, 12961-12968. DOI:10.1021/acssuschemeng.8b02428.
- [13] Y. Zhu, L. Song, N. Song, M. Li, C. Wang, X. Lu. Bifunctional and efficient CoS<sub>2</sub>-C@MoS<sub>2</sub> core-shell nanofiber electrocatalyst for water splitting. *ACS Sustain. Chem. Eng.* **2019**, *7*, 2899-2905. DOI:10.1021/acssuschemeng.8b05462.
- [14] Y. Guo, J. Tang, H. Qian, Z. Wang, Y. Yamauchi. One-pot synthesis of zeolitic imidazolate framework 67-derived hollow Co<sub>3</sub>S<sub>4</sub>@MoS<sub>2</sub> heterostructures as efficient bifunctional catalysts. *Chem. Mater.* **2017**, *29*, 5566-5573. DOI:10.1021/acs.chemmater.7b00867.
